# Supplementary material for: Enhancing the energy storage capacity of a symmetric supercapacitor employing α-Cu2P2O7 produced by a template-based co-precipitation approach
Source: Royal Society of Chemistry journal article supplement (doi:10.1039/d6ra02669a), 2026-05-27
Supplement: d6ra02669a1.pdf [file d6ra02669a1.pdf]

## Enhancing the energy storage capacity of a symmetric supercapacitor employing $\alpha$ - $\text{Cu}_2\text{P}_2\text{O}_7$ produced by a template-based co-precipitation approach.

Jay B. Patel<sup>1,3</sup>, Karan S. Modi<sup>1,3</sup>, Pruthvi Patel<sup>1,3</sup>, Dharti Patel<sup>1,3</sup>, Vanaraj Solanki<sup>3</sup>,  
Bhavin Patel<sup>4</sup>, Mitesh H. Patel<sup>\*2,3</sup>

<sup>1</sup>*P. D. Patel Institute of Applied Sciences, Charotar University of Science and Technology, Changa, Anand District, Gujarat 388421, India*

<sup>2</sup>*Analube Lab, Pramukh Swami Centre of Excellence for Renewable Energy, Charotar University of Science and Technology, Changa, Anand District, Gujarat 388421, India*

<sup>3</sup>*Dr. K. C. Patel Research and Development Centre, Charotar University of Science and Technology, Changa, Anand District, Gujarat 388421, India*

<sup>4</sup>*Natubhai V. Patel college of Pure and applied science, CVM University, Vallabh Vidhyanagar, Anand District, Gujarat 388120, India*

\*Corresponding author: Email: miteshpatel.bio@charusat.ac.in

### 1. XRD analysis of $\alpha$ - $\text{Cu}_2\text{P}_2\text{O}_7$ electrode

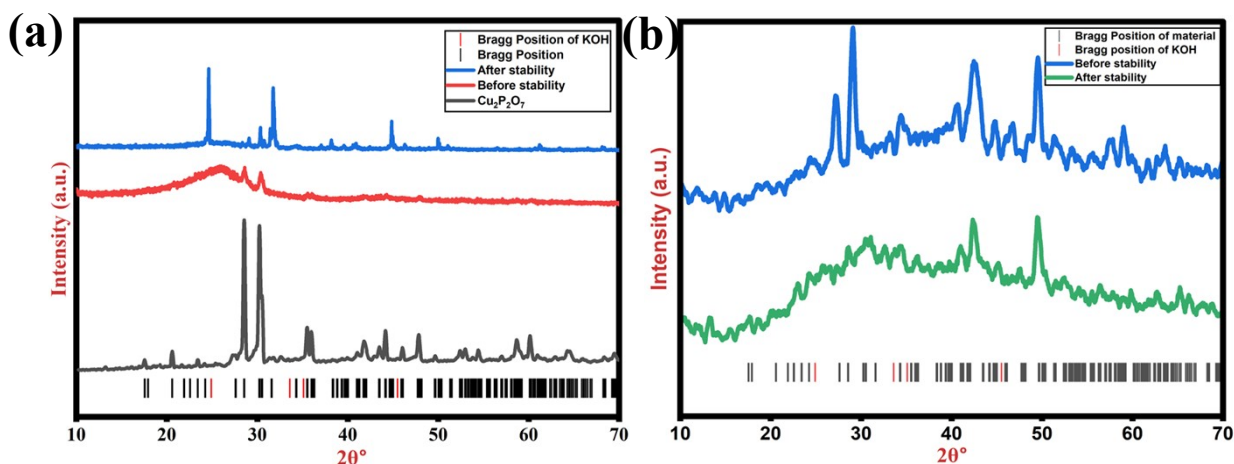

**Figure S 1 (a) XRD patterns of  $\alpha$ - $\text{Cu}_2\text{P}_2\text{O}_7$  electrode, before and after 5000 cycles, (b) XRD patterns of Symmetric SCs  $\alpha$ - $\text{Cu}_2\text{P}_2\text{O}_7$  electrodes, before and after 10000 cycles.**

Figure S1(a) shows the X-ray diffraction (XRD) patterns of the  $\alpha$ - $\text{Cu}_2\text{P}_2\text{O}_7$  electrode, recorded before and after 5000 charge-discharge cycles in a three-electrode system. XRD analysis of the  $\alpha$ - $\text{Cu}_2\text{P}_2\text{O}_7$  electrode after 5000 cycles reveals two more KOH peaks at  $2\theta$  angles of  $24.9^\circ$ ,  $33.6^\circ$ ,  $34.6^\circ$ , and  $44.8^\circ$ . These peaks are caused by KOH residue on the surface of carbon cloth (CC) fibers. All other peaks correspond to the conventional Bragg position, confirming the material's stability across 5000 charge-discharge cycles.

X-ray diffraction analysis (Figure S1(b)) was carried out on the electrode material before and after 10000 charge-discharge cycles. The pristine electrode's pattern validates the material's initial phase purity. However, the used electrode's XRD pattern shows extra diffraction peaks in addition to the original  $\alpha$ - $\text{Cu}_2\text{P}_2\text{O}_7$  reflections. The identified new peaks

correspond to KOH and carbon nano tubes. The presence of KOH residue on the SS electrode's surface causes the formation of a new peak. Similarly, the emergence of activated carbon is the result of extended cycling of the electrode material.

### 3. FE-SEM and EDX of before and after cycling stability of electrode

#### 3.1. Before cycling stability

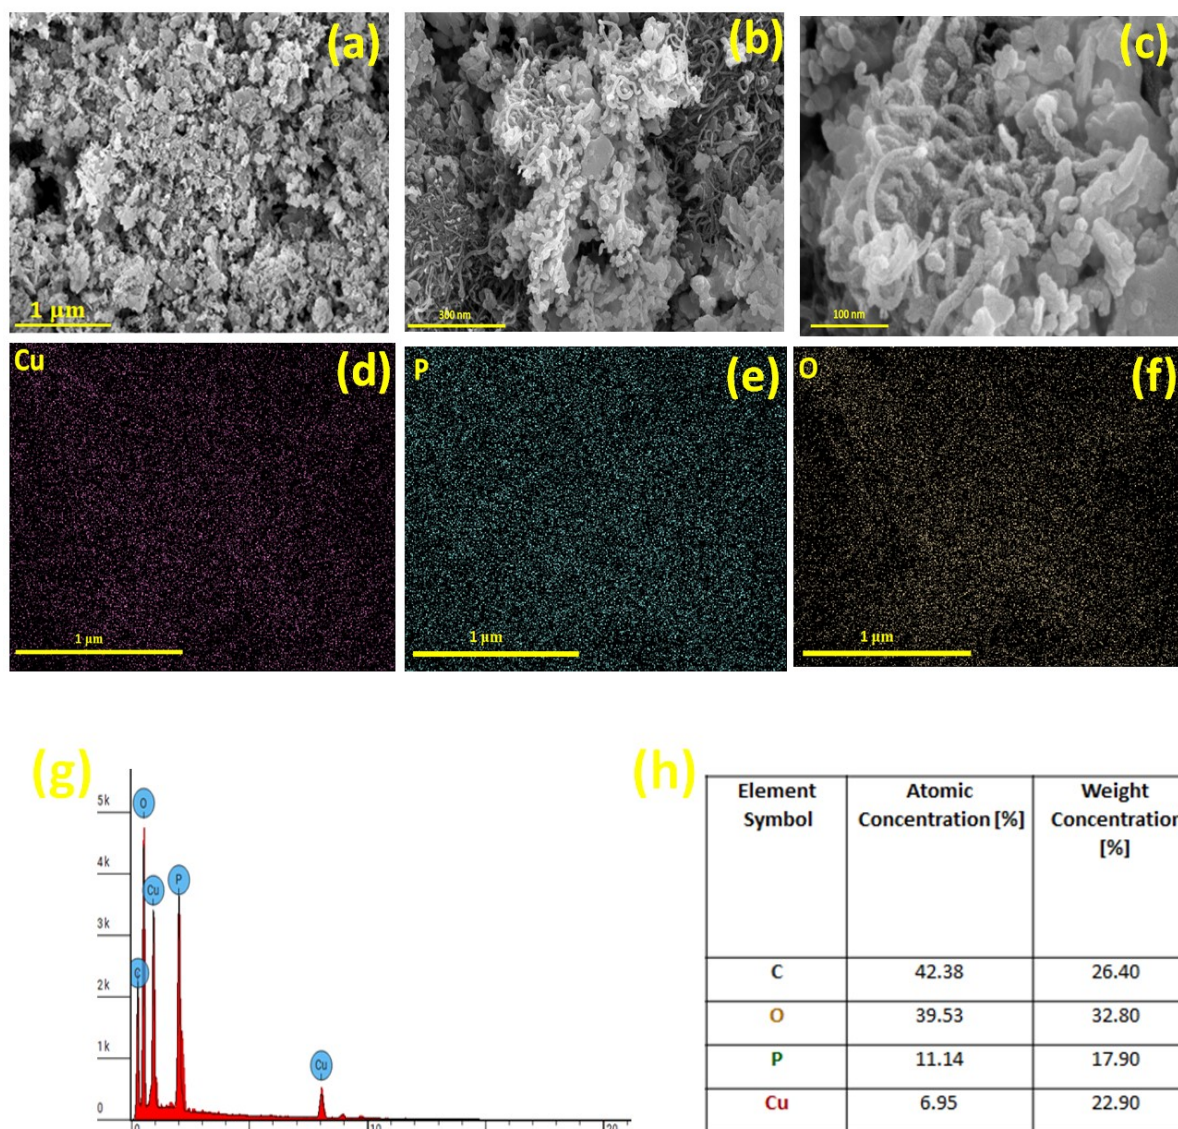

**Figure S2. (a-c) FE-SEM image of before cycling stability and (d-g) Elemental mapping (h) Table of concentration**

To validate the structural and morphological stability of the  $\alpha$ - $\text{Cu}_2\text{P}_2\text{O}_7$  electrode during long-term electrochemical cycling, FE-SEM characterization and EDX elemental analysis were performed on the electrode after 5000 charge-discharge cycles (Figure S2). Figure S2(a–c) presents FE-SEM images of the  $\alpha$ - $\text{Cu}_2\text{P}_2\text{O}_7$  electrode before cycling at different

magnifications (1  $\mu\text{m}$ , 300 nm, and 100 nm scale bars), revealing an interconnected porous morphology with a rough surface arising from the irregular polygonal nanoflake architecture of the active material uniformly distributed on the current collector. The EDX spectrum [Figure S2(g)] and elemental table [Figure S2(h)] confirm the presence of C (42.38 %), O (39.53%), P (11.14 %), and Cu (6.95%), where the high carbon content is attributed to the MWCNT conducting agent used during electrode fabrication. The uniform elemental mapping [Figure S2(d–f)] confirms the homogeneous distribution of Cu, P, and O across the electrode surface prior to cycling.

### 3.2 After cycling stability

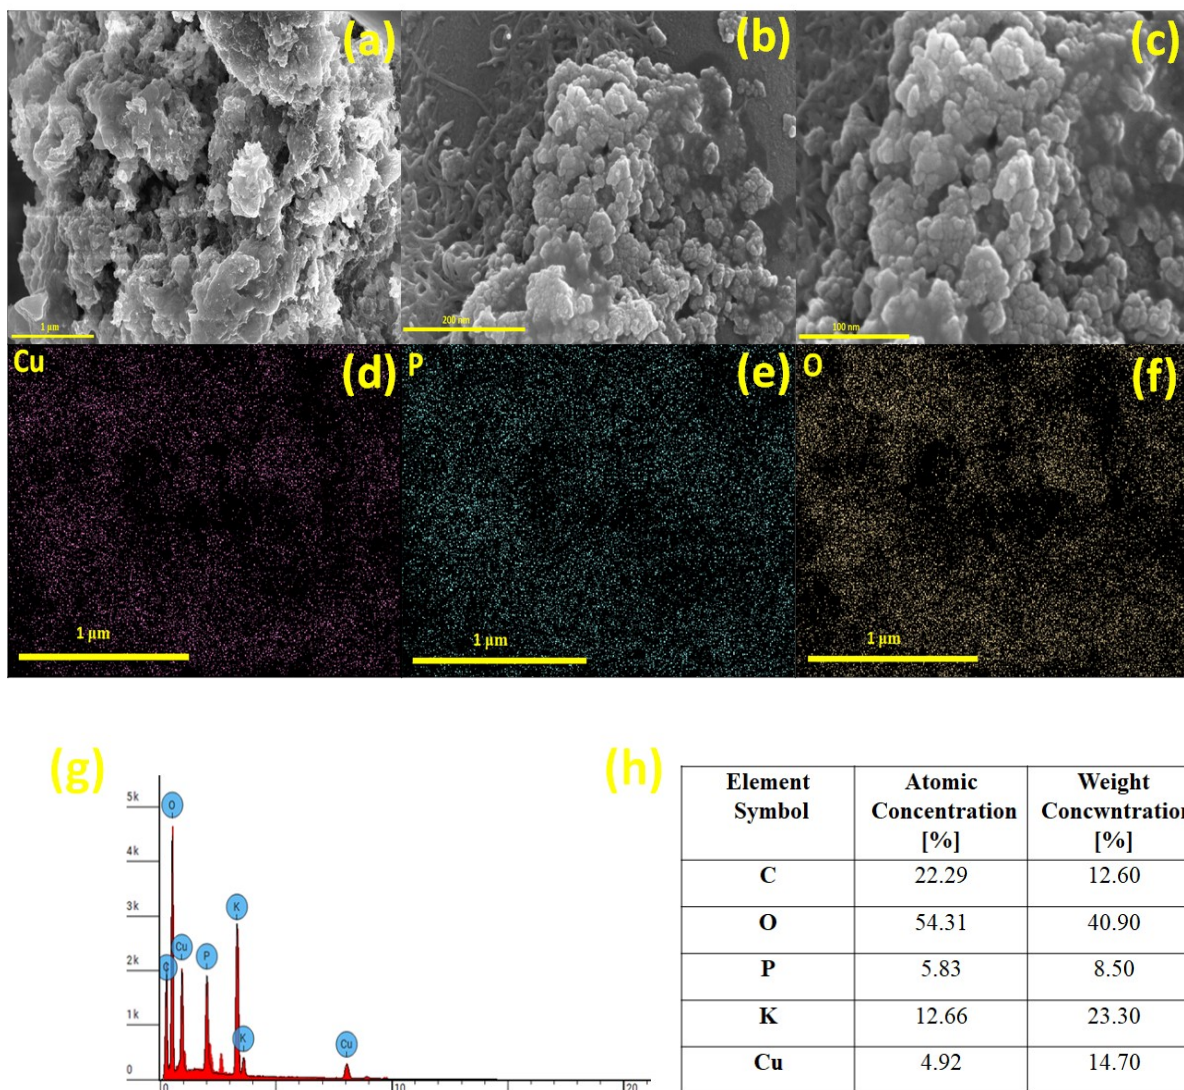

Figure S3. (a-c) FE-SEM image of after cycling stability and (d-g) Elemental mapping (h) Table of concentration

As illustrated in Figure S3(a–c), the interconnected porous morphology of the  $\alpha\text{-Cu}_2\text{P}_2\text{O}_7$  electrode is largely preserved after prolonged cycling, with no visible cracking, pulverization, or delamination of the active material from the current collector. This morphological stability is consistent with the 90% capacitance retention observed after 5000 cycles and confirms the mechanical robustness of the synthesized material. EDX analysis of the cycled electrode [Figure S3(g,h)] reveals the continued presence of Cu and P, confirming that no significant leaching or phase decomposition of  $\alpha\text{-Cu}_2\text{P}_2\text{O}_7$  occurred during cycling. The appearance of a K peak (12.66%) after cycling is attributed to the residual adsorption of  $\text{K}^+$  ions from the 6 M KOH electrolyte onto the electrode surface, which is an expected phenomenon for KOH-based supercapacitor systems and does not indicate structural degradation. The slight increase in O content (from 39.53% to 54.31%) is similarly attributed to surface-adsorbed KOH species. The elemental mapping [Figure S3(d–f)] confirms the uniform distribution of Cu, P, and O elements across the electrode surface after cycling, further supporting the compositional integrity of  $\alpha\text{-Cu}_2\text{P}_2\text{O}_7$ . Collectively, the post-cycling FE-SEM and EDX characterization provide direct morphological and compositional evidence for the outstanding long-term stability of  $\alpha\text{-Cu}_2\text{P}_2\text{O}_7$  as a symmetric supercapacitor electrode material.

#### 4. Cyclic voltammetry of $\alpha\text{-Cu}_2\text{P}_2\text{O}_7$ material at different potential

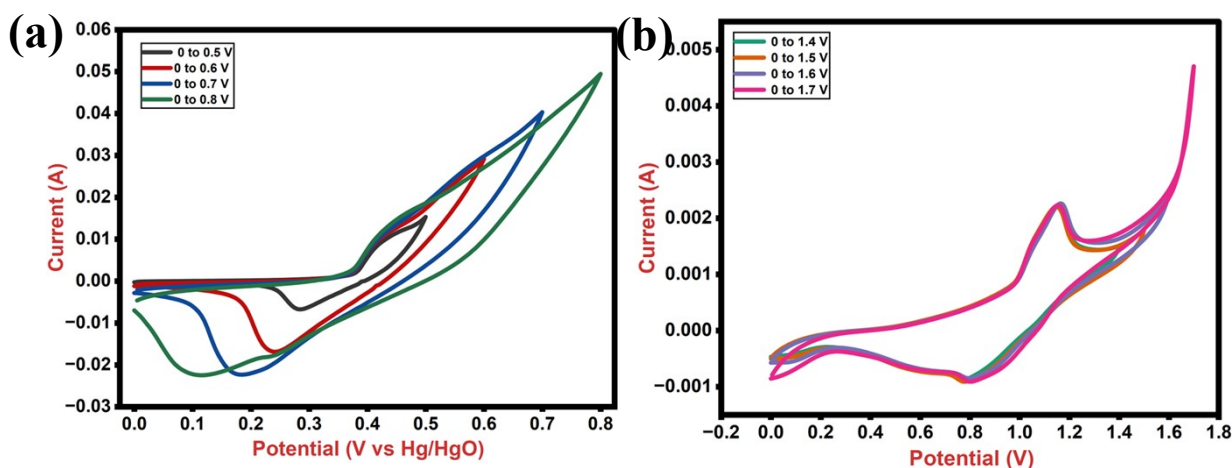

**Figure S (4) CV for three electrode configurations at different potential of  $\alpha\text{-Cu}_2\text{P}_2\text{O}_7$**

Figure S(4 (a)) demonstrates the CV of the  $\alpha\text{-Cu}_2\text{P}_2\text{O}_7$  electrode taken in different potential windows and a fixed scan rate of 20 mV/s. The data reveal that the electrode has a stable working window between 0 to 0.6 V in 6M aqueous KOH electrolyte. The performance of the electrode material is further limited by electrochemical polarization as the potential window increases.

Figure S(4 (b)) replicate the CV of symmetric supercapacitor device electrode, took at various potential with fixed scan rate of 20 mV/s.

**5. The below data of Crystallographic information file (CIF) from the Rietveld refinement.**

```
#####  
###
```

```
### FullProf-generated CIF output file (version: May 2019) ###
```

```
### Template of CIF submission form for structure report ###
```

```
#####  
###
```

```
# This file has been generated using FullProf.2k taking one example of  
# structure report provided by Acta Cryst. It is given as a 'template' with  
# filled structural items. Many other items are left unfilled and it is the  
# responsibility of the user to properly fill or suppress them. In principle  
# numerical value depending on the kind of CIF item.  
# See the document: cif_core.dic (URL: http://www.iucr.org) for details.
```

```
# Please notify any error or suggestion to:
```

```
# Juan Rodriguez-Carvajal (jrc@ill.eu)
```

```
# Improvements will be progressively added as needed.
```

```
# Date: 11/12/2024 Time: 13:37:04.714
```

**\_audit\_creation\_date 11/12/2024**

**\_audit\_creation\_method "FullProf Suite"**

**# PROCESSING SUMMARY (IUCr Office Use Only)**

**\_publ\_requested\_category ? # Acta C: one of CI/CM/CO/FI/FM/FO**

**# Definition of non standard CIF items (Reliability indices used in FULLPROF)**

| <b>#</b> | <b>Name</b> | <b>Explanation</b> | <b>Standard?</b> |
|----------|-------------|--------------------|------------------|
|----------|-------------|--------------------|------------------|

| <b>#</b> | <b>-----</b> | <b>-----</b> | <b>-----</b> |
|----------|--------------|--------------|--------------|
|----------|--------------|--------------|--------------|

|  |                              |                                           |    |
|--|------------------------------|-------------------------------------------|----|
|  | '_pd_proc_ls_prof_cR_factor' | 'Prof. R-factor CORRECTED for background' | no |
|--|------------------------------|-------------------------------------------|----|

|  |                               |                                           |    |
|--|-------------------------------|-------------------------------------------|----|
|  | '_pd_proc_ls_prof_cwR_factor' | 'wProf.R-factor CORRECTED for background' | no |
|--|-------------------------------|-------------------------------------------|----|

|  |                                 |                                           |    |
|--|---------------------------------|-------------------------------------------|----|
|  | '_pd_proc_ls_prof_cwR_expected' | 'wProf.Expected CORRECTED for background' | no |
|--|---------------------------------|-------------------------------------------|----|

|  |                         |                                        |    |
|--|-------------------------|----------------------------------------|----|
|  | '_pd_proc_ls_prof_chi2' | 'Chi-square for all considered points' | no |
|--|-------------------------|----------------------------------------|----|

|  |                          |                                            |    |
|--|--------------------------|--------------------------------------------|----|
|  | '_pd_proc_ls_prof_echi2' | 'Chi-2 for points with Bragg contribution' | no |
|--|--------------------------|--------------------------------------------|----|

**#=====**  
**=====**

**# 3. TITLE AND AUTHOR LIST**

**\_publ\_section\_title**

**;' #Date: 2017-07-04 18:48:19 +0300 (Tue, 04 Jul 2017) \$'**

**;**

**\_publ\_section\_title\_footnote**

**# The loop structure below should contain the names and addresses of all**

**# authors, in the required order of publication. Repeat as necessary.**

**\_atom\_type\_scatter\_source**

**cu 13.33800 3.58280 7.16760 0.24700 5.61580 11.39660**

**1.67350 64.81260 1.19100 -2.01900 0.58900**

**International\_Tables\_for\_Crystallography\_Vol.C(1991)\_Tables\_6.1.1.4\_and\_6.1.1.5**

**p 6.43450 1.90670 4.17910 27.15700 1.78000 0.52600**

**1.49080 68.16450 1.11490 0.28300 0.43400**

**International\_Tables\_for\_Crystallography\_Vol.C(1991)\_Tables\_6.1.1.4\_and\_6.1.1.5**

**o 3.04850 13.27710 2.28680 5.70110 1.54630 0.32390**

**0.86700 32.90890 0.25080 0.04700 0.03200**

**International\_Tables\_for\_Crystallography\_Vol.C(1991)\_Tables\_6.1.1.4\_and\_6.1.1.5**

**#=====**  
**=====**

**# 6. POWDER SPECIMEN AND CRYSTAL DATA**

**\_symmetry\_cell\_setting Monoclinic**

**\_symmetry\_space\_group\_name\_H-M 'C 1 2/c 1'**

**\_symmetry\_space\_group\_name\_Hall '-C 2yc'**

**\_symmetry\_equiv\_pos\_as\_xyz**

**'x,y,z'**

**'-x,y,-z+1/2'**

**'-x,-y,-z'**

**'x,-y,z+1/2'**

**'x+1/2,y+1/2,z'**

**'-x+1/2,y+1/2,-z+1/2'**

**'-x+1/2,-y+1/2,-z'**

**'x+1/2,-y+1/2,z+1/2'**

**\_cell\_length\_a            6.84409**

**\_cell\_length\_b            8.11770**

**\_cell\_length\_c            9.13991**

**\_cell\_angle\_alpha        90.0000**

**\_cell\_angle\_beta         109.210**

**\_cell\_angle\_gamma        90.0000**

**\_cell\_volume              479.524**

**\_cell\_formula\_units\_Z     ?**

**\_cell\_measurement\_temperature    ?**

**\_cell\_special\_details**

**;** ?

**;**

**# The next three fields give the specimen dimensions in mm. The equatorial**

**# plane contains the incident and diffracted beam.**

**\_pd\_spec\_size\_axial**            ?    # perpendicular to

**# equatorial plane**

**\_pd\_spec\_size\_equat**            ?    # parallel to

**# scattering vector**

**# in transmission**

**\_pd\_spec\_size\_thick**            ?    # parallel to

**# scattering vector**

**# in reflection**

**# The next five fields are character fields that describe the specimen.**

**\_pd\_spec\_mounting**                    # This field should be

**# used to give details of the**

**# container.**

**;** ?

**;**

**\_pd\_spec\_mount\_mode**            ?    # options are 'reflection'

**# or 'transmission'**

**\_pd\_spec\_shape**                    ?    # options are 'cylinder'

**# 'flat\_sheet' or 'irregular'**

**\_pd\_char\_particle\_morphology**    ?

**\_pd\_char\_colour**                    ?    # use ICDD colour descriptions

**# The following three fields describe the preparation of the specimen.**

**# The cooling rate is in K/min. The pressure at which the sample was**

**# prepared is in kPa. The temperature of preparation is in K.**

## **# 7. EXPERIMENTAL DATA**

**\_exptl\_special\_details**

**;** ?

**;**

**# The following item is used to identify the equipment used to record**

**# the powder pattern when the diffractogram was measured at a laboratory**

**# other than the authors' home institution, e.g. when neutron or synchrotron**

**# radiation is used.**

**\_pd\_instr\_location**

**;** ?

**;**

**\_pd\_calibration\_special\_details**      **# description of the method used**

**# to calibrate the instrument**

**;** ?

**;**

**\_diffrn\_ambient\_temperature**      **?**

**\_diffrn\_source** ? # Put here: 'rotating-anode X-ray tube' or similar

**\_diffrn\_radiation\_type** 'X-ray'

**\_diffrn\_source\_target** ? # Put here the chemical symbol of the anode

**\_diffrn\_detector\_type** ? # make or model of detector

**\_pd\_meas\_scan\_method** ? # options are 'step', 'cont',

# 'tof', 'fixed' or

# 'disp' (= dispersive)

**\_#** The following four items give details of the measured (not processed)

**#** powder pattern. Angles are in degrees.

**\_pd\_meas\_number\_of\_points** 3006

**\_pd\_meas\_2theta\_range\_min** 10.12340

**\_pd\_meas\_2theta\_range\_max** 70.97740

**\_pd\_meas\_2theta\_range\_inc** 0.020256

#####  
=====

## **# 8. REFINEMENT DATA**

**\_refine\_special\_details**

;

;

**# Use the next field to give any special details about the fitting of the  
# powder pattern.**

**\_pd\_proc\_ls\_special\_details**

**;**

**;**

**# The next three items are given as text.**

**# The following profile R-factors are NOT CORRECTED for background**

**# The sum is extended to all non-excluded points.**

**# These are the current CIF standard**

|                                     |               |
|-------------------------------------|---------------|
| <b>_pd_proc_ls_prof_R_factor</b>    | <b>4.6639</b> |
| <b>_pd_proc_ls_prof_wR_factor</b>   | <b>6.6163</b> |
| <b>_pd_proc_ls_prof_wR_expected</b> | <b>5.1133</b> |

**# The following profile R-factors are CORRECTED for background**

**# The sum is extended to all non-excluded points.**

**# These items are not in the current CIF standard, but are defined above**

|                                      |                |
|--------------------------------------|----------------|
| <b>_pd_proc_ls_prof_cR_factor</b>    | <b>26.9940</b> |
| <b>_pd_proc_ls_prof_cwR_factor</b>   | <b>23.3414</b> |
| <b>_pd_proc_ls_prof_cwR_expected</b> | <b>18.0388</b> |

**# The following items are not in the CIF standard, but are defined above**

**\_pd\_proc\_ls\_prof\_chi2            1.6743**

**\_pd\_proc\_ls\_prof\_echi2         1.8189**

**# Items related to LS refinement**

**\_refine\_ls\_R\_I\_factor           11.4205**

**\_refine\_ls\_number\_reflns       259**

**\_refine\_ls\_number\_parameters    2**

**\_refine\_ls\_number\_restraints    0**

**# The following four items apply to angular dispersive measurements.**

**# 2theta minimum, maximum and increment (in degrees) are for the**

**# intensities used in the refinement.**

**\_pd\_proc\_2theta\_range\_min       10.2331**

**\_pd\_proc\_2theta\_range\_max       71.0871**

**\_pd\_proc\_2theta\_range\_inc       0.020256**

**\_pd\_proc\_wavelength            1.540560**

**\_pd\_block\_diffraction\_id       ? # The id used for the block containing**

**# the powder pattern profile (section 11)**

**# Give appropriate details in the next two text fields.**

**\_pd\_proc\_info\_excluded\_regions ?**

**\_pd\_proc\_info\_data\_reduction ?**

**# The following items are used to identify the programs used.**

**\_\_computing\_structure\_refinement FULLPROF**

**\_computing\_molecular\_graphics ?**

**\_computing\_publication\_material ?**

**#=====**  
**=====**

## **# 9. ATOMIC COORDINATES AND DISPLACEMENT PARAMETERS**

**loop\_**

**\_atom\_site\_label**

**\_atom\_site\_fract\_x**

**\_atom\_site\_fract\_y**

**\_atom\_site\_fract\_z**

**\_atom\_site\_U\_iso\_or\_equiv**

**\_atom\_site\_occupancy**

**\_atom\_site\_adp\_type**

**\_atom\_site\_type\_symbol**

**Cu3 -0.0078 0.31228 0.50805 -0.0186 1.00000 Uiso Cu**

**P31 0.20039 -0.0038 0.20632 -0.0130 1.00000 Uiso P**

**O31 0.00000 0.04557 0.25000 -0.0161 1.00000 Uiso O**

**O32 0.38042 0.01015 0.35155 -0.0198 1.00000 Uiso O**

**O33 0.16824 0.15064 0.11162 -0.0121 1.00000 Uiso O**

**O34 0.21913 -0.1504 0.11964 -0.0372 1.00000 Uiso O**

**# Note: if the displacement parameters were refined anisotropically**

**# the U matrices should be given as for single-crystal studies.**

**#=====**  
**=====**

**# 10. DISTANCES AND ANGLES / MOLECULAR GEOMETRY**

**\_geom\_special\_details            ?**

**loop\_**

**\_geom\_bond\_atom\_site\_label\_1**

**\_geom\_bond\_atom\_site\_label\_2**

**\_geom\_bond\_site\_symmetry\_1**

**\_geom\_bond\_site\_symmetry\_2**

**\_geom\_bond\_distance**

**\_geom\_bond\_publ\_flag**

? ? ? ? ? ?
